# Supplementary material
Source: PubMed Central journal article supplement (PMC3472117)
Supplement: NIHMS391691-supplement-supplement_1.pdf [file NIHMS391691-supplement-supplement_1.pdf]

**Table S1. Gene-vitamin A interaction results for HDL-C levels, adjusted for age and sex.**

| SNP        | Non-Hispanic Whites<br>SNP×VitA Interaction |       |                 | Non-Hispanic Blacks<br>SNP×VitA Interaction |       |         | Mexican Americans<br>SNP×VitA Interaction |       |         |
|------------|---------------------------------------------|-------|-----------------|---------------------------------------------|-------|---------|-------------------------------------------|-------|---------|
|            | Beta                                        | SE    | P-value         | Beta                                        | SE    | P-value | Beta                                      | SE    | P-value |
| rs11206510 | -0.025                                      | 0.035 | 0.471           | -0.023                                      | 0.056 | 0.684   | 0.007                                     | 0.046 | 0.873   |
| rs12654264 | -0.036                                      | 0.026 | 0.174           | 0.014                                       | 0.039 | 0.717   | -0.018                                    | 0.031 | 0.567   |
| rs1501908  | 0.046                                       | 0.026 | 0.075           | 0.019                                       | 0.037 | 0.610   | -0.007                                    | 0.035 | 0.832   |
| rs174547   | 0.015                                       | 0.028 | 0.598           | -0.029                                      | 0.050 | 0.563   | 0.003                                     | 0.031 | 0.924   |
| rs1748195  | 0.087                                       | 0.027 | <b>1.16E-03</b> | 0.096                                       | 0.039 | 0.014   | 0.014                                     | 0.030 | 0.642   |
| rs1883025  | -0.052                                      | 0.029 | 0.074           | -0.080                                      | 0.037 | 0.032   | 0.000                                     | 0.033 | 0.996   |
| rs2156552  | -0.022                                      | 0.037 | 0.558           | -0.081                                      | 0.099 | 0.414   | -0.027                                    | 0.061 | 0.656   |
| rs2197089  | 0.009                                       | 0.026 | 0.739           | -0.006                                      | 0.044 | 0.888   | 0.003                                     | 0.031 | 0.911   |
| rs2271293  | -0.066                                      | 0.040 | 0.104           | -0.146                                      | 0.070 | 0.037   | -0.071                                    | 0.046 | 0.121   |
| rs2338104  | 0.009                                       | 0.026 | 0.719           | -0.041                                      | 0.040 | 0.307   | -0.015                                    | 0.031 | 0.620   |
| rs2954029  | -0.003                                      | 0.025 | 0.893           | 0.008                                       | 0.036 | 0.826   | 0.017                                     | 0.030 | 0.585   |
| rs2967605  | -0.043                                      | 0.032 | 0.183           | -0.056                                      | 0.047 | 0.233   | 0.037                                     | 0.035 | 0.280   |
| rs3135506  | -0.029                                      | 0.052 | 0.582           | 0.070                                       | 0.072 | 0.331   | -0.093                                    | 0.040 | 0.019   |
| rs3764261  | -0.043                                      | 0.027 | 0.114           | -0.045                                      | 0.039 | 0.245   | 0.004                                     | 0.032 | 0.907   |
| rs3890182  | -0.020                                      | 0.039 | 0.607           | -0.019                                      | 0.060 | 0.749   | 0.047                                     | 0.057 | 0.408   |
| rs4149268  | -0.038                                      | 0.027 | 0.163           | 0.006                                       | 0.037 | 0.871   | -0.066                                    | 0.032 | 0.040   |
| rs4775041  | 0.008                                       | 0.028 | 0.776           | 0.047                                       | 0.052 | 0.361   | 0.013                                     | 0.041 | 0.745   |
| rs6102059  | -0.028                                      | 0.028 | 0.312           | -0.023                                      | 0.036 | 0.526   | 0.035                                     | 0.035 | 0.314   |
| rs693      | -0.032                                      | 0.026 | 0.212           | 0.031                                       | 0.046 | 0.496   | -0.026                                    | 0.032 | 0.418   |
| rs754523   | -0.028                                      | 0.028 | 0.320           | 0.096                                       | 0.047 | 0.039   | -0.016                                    | 0.033 | 0.618   |
| rs7679     | 0.027                                       | 0.034 | 0.423           | -0.003                                      | 0.085 | 0.970   | -0.057                                    | 0.041 | 0.164   |
| rs780094   | 0.026                                       | 0.026 | 0.307           | 0.022                                       | 0.047 | 0.646   | 0.005                                     | 0.031 | 0.877   |
| rs9989419  | -0.036                                      | 0.027 | 0.177           | -0.005                                      | 0.036 | 0.890   | -0.021                                    | 0.032 | 0.503   |

**Table S2. Gene-vitamin A interaction results for LDL-C levels, adjusted for age and sex.**

| SNP        | Non-Hispanic Whites<br>SNP×VitA Interaction |       |         | Non-Hispanic Blacks<br>SNP×VitA Interaction |       |         | Mexican Americans<br>SNP×VitA Interaction |       |                 |
|------------|---------------------------------------------|-------|---------|---------------------------------------------|-------|---------|-------------------------------------------|-------|-----------------|
|            | Beta                                        | SE    | P-value | Beta                                        | SE    | P-value | Beta                                      | SE    | P-value         |
| rs11206510 | 0.002                                       | 0.102 | 0.982   | 0.342                                       | 0.155 | 0.027   | 0.583                                     | 0.147 | <b>7.65E-05</b> |
| rs12654264 | 0.056                                       | 0.078 | 0.471   | 0.048                                       | 0.108 | 0.659   | -0.130                                    | 0.098 | 0.185           |
| rs1501908  | 0.071                                       | 0.078 | 0.365   | -0.081                                      | 0.107 | 0.449   | -0.211                                    | 0.106 | 0.047           |
| rs174547   | -0.068                                      | 0.084 | 0.421   | 0.307                                       | 0.176 | 0.081   | -0.102                                    | 0.093 | 0.269           |
| rs1748195  | 0.043                                       | 0.082 | 0.606   | -0.267                                      | 0.112 | 0.018   | 0.000                                     | 0.091 | 1.000           |
| rs1883025  | 0.181                                       | 0.087 | 0.038   | 0.013                                       | 0.112 | 0.908   | 0.001                                     | 0.104 | 0.994           |
| rs2156552  | -0.227                                      | 0.110 | 0.040   | -0.052                                      | 0.278 | 0.853   | -0.070                                    | 0.181 | 0.699           |
| rs2197089  | -0.004                                      | 0.076 | 0.961   | 0.132                                       | 0.123 | 0.283   | -0.136                                    | 0.095 | 0.155           |
| rs2271293  | -0.075                                      | 0.125 | 0.546   | 0.024                                       | 0.184 | 0.894   | -0.103                                    | 0.135 | 0.443           |
| rs2338104  | -0.037                                      | 0.078 | 0.636   | -0.005                                      | 0.109 | 0.962   | -0.201                                    | 0.097 | 0.038           |
| rs2954029  | -0.010                                      | 0.072 | 0.885   | -0.031                                      | 0.107 | 0.770   | 0.099                                     | 0.090 | 0.275           |
| rs2967605  | 0.063                                       | 0.092 | 0.494   | -0.005                                      | 0.135 | 0.973   | -0.123                                    | 0.101 | 0.223           |
| rs3135506  | 0.255                                       | 0.151 | 0.093   | -0.502                                      | 0.225 | 0.026   | -0.132                                    | 0.119 | 0.268           |
| rs3764261  | -0.033                                      | 0.081 | 0.679   | 0.141                                       | 0.110 | 0.203   | 0.031                                     | 0.099 | 0.755           |
| rs3890182  | -0.008                                      | 0.122 | 0.947   | -0.268                                      | 0.169 | 0.113   | 0.199                                     | 0.182 | 0.274           |
| rs4149268  | 0.146                                       | 0.080 | 0.068   | -0.167                                      | 0.099 | 0.093   | 0.025                                     | 0.099 | 0.803           |
| rs4775041  | -0.012                                      | 0.081 | 0.886   | 0.065                                       | 0.141 | 0.644   | 0.107                                     | 0.128 | 0.403           |
| rs6102059  | -0.005                                      | 0.081 | 0.952   | 0.110                                       | 0.102 | 0.282   | -0.029                                    | 0.107 | 0.785           |
| rs693      | 0.146                                       | 0.079 | 0.066   | -0.133                                      | 0.135 | 0.327   | 0.255                                     | 0.101 | 0.012           |
| rs754523   | 0.011                                       | 0.083 | 0.892   | -0.095                                      | 0.137 | 0.487   | -0.150                                    | 0.104 | 0.150           |
| rs7679     | 0.055                                       | 0.103 | 0.594   | -0.562                                      | 0.305 | 0.066   | 0.020                                     | 0.129 | 0.875           |
| rs780094   | -0.044                                      | 0.079 | 0.577   | -0.088                                      | 0.132 | 0.505   | 0.162                                     | 0.100 | 0.106           |
| rs9989419  | 0.060                                       | 0.079 | 0.449   | -0.028                                      | 0.099 | 0.776   | 0.110                                     | 0.096 | 0.250           |

**Table S3. Gene-vitamin A interaction results for transformed triglyceride levels, adjusted for age and sex.**

| SNP        | Non-Hispanic Whites<br>SNPxVitA Interaction |        |                 | Non-Hispanic Blacks<br>SNPxVitA Interaction |        |         | Mexican Americans<br>SNPxVitA Interaction |        |         |
|------------|---------------------------------------------|--------|-----------------|---------------------------------------------|--------|---------|-------------------------------------------|--------|---------|
|            | Beta                                        | SE     | P-value         | Beta                                        | SE     | P-value | Beta                                      | SE     | P-value |
| rs11206510 | -0.0003                                     | 0.0013 | 0.789           | 0.0001                                      | 0.0017 | 0.971   | 0.0037                                    | 0.0020 | 0.071   |
| rs12654264 | 0.0009                                      | 0.0009 | 0.330           | 0.0001                                      | 0.0012 | 0.943   | -0.0011                                   | 0.0014 | 0.430   |
| rs1501908  | 0.0005                                      | 0.0009 | 0.634           | -0.0017                                     | 0.0011 | 0.128   | -0.0012                                   | 0.0015 | 0.401   |
| rs174547   | 0.0001                                      | 0.0010 | 0.905           | -0.0005                                     | 0.0019 | 0.781   | 0.0013                                    | 0.0013 | 0.312   |
| rs1748195  | 0.0003                                      | 0.0010 | 0.797           | -0.0006                                     | 0.0012 | 0.584   | -0.0001                                   | 0.0013 | 0.919   |
| rs1883025  | 0.0015                                      | 0.0011 | 0.163           | 0.0010                                      | 0.0012 | 0.412   | 0.0003                                    | 0.0014 | 0.828   |
| rs2156552  | -0.0022                                     | 0.0013 | 0.097           | 0.0033                                      | 0.0030 | 0.278   | 0.0001                                    | 0.0026 | 0.976   |
| rs2197089  | 0.0001                                      | 0.0009 | 0.950           | -0.0008                                     | 0.0014 | 0.554   | 0.0006                                    | 0.0013 | 0.648   |
| rs2271293  | 0.0033                                      | 0.0015 | 0.027           | -0.0024                                     | 0.0021 | 0.252   | 0.0000                                    | 0.0020 | 0.986   |
| rs2338104  | 0.0018                                      | 0.0009 | 0.056           | 0.0008                                      | 0.0012 | 0.527   | 0.0007                                    | 0.0013 | 0.618   |
| rs2954029  | 0.0002                                      | 0.0009 | 0.800           | -0.0003                                     | 0.0012 | 0.796   | -0.0003                                   | 0.0013 | 0.847   |
| rs2967605  | 0.0008                                      | 0.0012 | 0.487           | 0.0037                                      | 0.0014 | 0.009   | -0.0029                                   | 0.0015 | 0.046   |
| rs3135506  | -0.0048                                     | 0.0019 | 0.011           | 0.0007                                      | 0.0024 | 0.766   | 0.0027                                    | 0.0016 | 0.102   |
| rs3764261  | 0.0009                                      | 0.0010 | 0.363           | -0.0009                                     | 0.0012 | 0.419   | -0.0030                                   | 0.0014 | 0.036   |
| rs3890182  | -0.0011                                     | 0.0014 | 0.450           | 0.0020                                      | 0.0018 | 0.275   | 0.0013                                    | 0.0026 | 0.616   |
| rs4149268  | 0.0000                                      | 0.0010 | 0.990           | 0.0008                                      | 0.0011 | 0.444   | 0.0019                                    | 0.0014 | 0.194   |
| rs4775041  | -0.0001                                     | 0.0010 | 0.959           | 0.0009                                      | 0.0015 | 0.536   | -0.0006                                   | 0.0018 | 0.716   |
| rs6102059  | -0.0005                                     | 0.0010 | 0.606           | 0.0014                                      | 0.0011 | 0.194   | 0.0002                                    | 0.0016 | 0.877   |
| rs693      | 0.0028                                      | 0.0009 | <b>2.16E-03</b> | 0.0000                                      | 0.0014 | 0.975   | 0.0009                                    | 0.0013 | 0.506   |
| rs754523   | -0.0005                                     | 0.0010 | 0.591           | -0.0022                                     | 0.0014 | 0.114   | -0.0022                                   | 0.0014 | 0.110   |
| rs7679     | 0.0000                                      | 0.0012 | 0.976           | 0.0015                                      | 0.0026 | 0.548   | -0.0004                                   | 0.0018 | 0.841   |
| rs780094   | 0.0000                                      | 0.0009 | 0.990           | 0.0005                                      | 0.0015 | 0.751   | 0.0024                                    | 0.0014 | 0.078   |
| rs9989419  | 0.0022                                      | 0.0010 | 0.027           | 0.0001                                      | 0.0011 | 0.921   | -0.0001                                   | 0.0014 | 0.935   |

**Table S4. Gene-vitamin E interaction results for HDL-C levels, adjusted for age and sex.**

| SNP        | Non-Hispanic Whites<br>SNP×VitE Interaction |       |                 | Non-Hispanic Blacks<br>SNP×VitE Interaction |       |         | Mexican Americans<br>SNP×VitE Interaction |       |         |
|------------|---------------------------------------------|-------|-----------------|---------------------------------------------|-------|---------|-------------------------------------------|-------|---------|
|            | Beta                                        | SE    | P-value         | Beta                                        | SE    | P-value | Beta                                      | SE    | P-value |
| rs11206510 | 1.834                                       | 1.376 | 0.183           | -5.272                                      | 3.026 | 0.082   | -0.921                                    | 2.070 | 0.657   |
| rs12654264 | -1.334                                      | 1.108 | 0.229           | -0.414                                      | 2.166 | 0.848   | 1.020                                     | 1.383 | 0.461   |
| rs1501908  | 0.247                                       | 1.102 | 0.823           | -1.320                                      | 2.061 | 0.522   | -0.045                                    | 1.455 | 0.975   |
| rs174547   | 0.575                                       | 1.138 | 0.613           | -0.037                                      | 3.297 | 0.991   | -2.094                                    | 1.333 | 0.116   |
| rs1748195  | 3.279                                       | 1.063 | <b>2.06E-03</b> | 0.676                                       | 2.130 | 0.751   | -1.498                                    | 1.329 | 0.260   |
| rs1883025  | -0.531                                      | 1.243 | 0.669           | 2.644                                       | 2.134 | 0.216   | 1.762                                     | 1.383 | 0.203   |
| rs2156552  | -1.519                                      | 1.430 | 0.288           | 2.041                                       | 4.586 | 0.656   | -1.742                                    | 2.631 | 0.508   |
| rs2197089  | -2.016                                      | 1.077 | 0.061           | -1.881                                      | 2.494 | 0.451   | 2.712                                     | 1.243 | 0.029   |
| rs2271293  | 0.252                                       | 1.702 | 0.882           | 4.049                                       | 4.292 | 0.346   | -2.066                                    | 2.038 | 0.311   |
| rs2338104  | 0.953                                       | 1.077 | 0.376           | -2.549                                      | 2.112 | 0.228   | 0.105                                     | 1.313 | 0.936   |
| rs2954029  | -0.663                                      | 1.057 | 0.530           | 2.050                                       | 2.107 | 0.331   | -2.002                                    | 1.352 | 0.139   |
| rs2967605  | -1.089                                      | 1.355 | 0.422           | 2.425                                       | 2.506 | 0.333   | 0.848                                     | 1.534 | 0.580   |
| rs3135506  | -5.433                                      | 2.208 | 0.014           | -2.779                                      | 4.517 | 0.539   | -5.204                                    | 1.844 | 0.005   |
| rs3764261  | -0.834                                      | 1.133 | 0.462           | 0.303                                       | 2.351 | 0.897   | -0.345                                    | 1.441 | 0.811   |
| rs3890182  | 0.429                                       | 1.644 | 0.794           | -5.264                                      | 3.215 | 0.102   | 6.950                                     | 2.409 | 0.004   |
| rs4149268  | 0.823                                       | 1.135 | 0.468           | 0.177                                       | 2.001 | 0.930   | 0.668                                     | 1.428 | 0.640   |
| rs4775041  | -0.088                                      | 1.155 | 0.939           | -1.690                                      | 2.976 | 0.570   | -0.153                                    | 1.674 | 0.927   |
| rs6102059  | 1.169                                       | 1.161 | 0.314           | 1.435                                       | 1.872 | 0.444   | 0.924                                     | 1.443 | 0.522   |
| rs693      | -1.092                                      | 1.093 | 0.318           | 1.502                                       | 2.640 | 0.569   | 0.396                                     | 1.441 | 0.784   |
| rs754523   | -0.944                                      | 1.112 | 0.396           | 1.108                                       | 2.536 | 0.662   | -0.230                                    | 1.422 | 0.872   |
| rs7679     | 1.210                                       | 1.364 | 0.375           | 13.123                                      | 5.165 | 0.011   | -4.159                                    | 1.940 | 0.032   |
| rs780094   | 2.547                                       | 1.046 | 0.015           | 1.438                                       | 2.791 | 0.606   | -0.054                                    | 1.376 | 0.969   |
| rs9989419  | 0.277                                       | 1.086 | 0.799           | -2.350                                      | 1.998 | 0.240   | 0.052                                     | 1.420 | 0.971   |

**Table S5. Gene-vitamin E interaction results for LDL-C levels, adjusted for age and sex.**

| SNP        | Non-Hispanic Whites<br>SNP×VitE Interaction |       |                 | Non-Hispanic Blacks<br>SNP×VitE Interaction |        |         | Mexican Americans<br>SNP×VitE Interaction |       |                 |
|------------|---------------------------------------------|-------|-----------------|---------------------------------------------|--------|---------|-------------------------------------------|-------|-----------------|
|            | Beta                                        | SE    | P-value         | Beta                                        | SE     | P-value | Beta                                      | SE    | P-value         |
| rs11206510 | -3.284                                      | 3.797 | 0.387           | 17.961                                      | 7.515  | 0.017   | 17.617                                    | 6.225 | 0.005           |
| rs12654264 | -3.327                                      | 3.009 | 0.269           | 1.072                                       | 5.676  | 0.850   | -5.377                                    | 4.087 | 0.189           |
| rs1501908  | 1.125                                       | 3.090 | 0.716           | -10.704                                     | 5.068  | 0.035   | -0.512                                    | 4.211 | 0.903           |
| rs174547   | -1.971                                      | 3.193 | 0.537           | -2.235                                      | 8.043  | 0.781   | 3.754                                     | 3.793 | 0.323           |
| rs1748195  | -4.179                                      | 3.030 | 0.168           | -1.313                                      | 5.458  | 0.810   | 2.922                                     | 3.824 | 0.445           |
| rs1883025  | -1.795                                      | 3.538 | 0.612           | -6.115                                      | 5.332  | 0.252   | -11.222                                   | 3.842 | 0.004           |
| rs2156552  | -6.600                                      | 3.897 | 0.091           | -3.780                                      | 11.963 | 0.752   | -1.331                                    | 7.376 | 0.857           |
| rs2197089  | 1.116                                       | 3.049 | 0.714           | 7.244                                       | 6.460  | 0.262   | -3.602                                    | 3.743 | 0.336           |
| rs2271293  | 4.031                                       | 4.879 | 0.409           | -2.141                                      | 10.145 | 0.833   | -9.130                                    | 5.616 | 0.104           |
| rs2338104  | -0.165                                      | 3.005 | 0.956           | -5.746                                      | 5.468  | 0.294   | -3.743                                    | 3.835 | 0.329           |
| rs2954029  | 3.404                                       | 2.853 | 0.233           | -4.995                                      | 5.378  | 0.353   | 4.473                                     | 3.866 | 0.248           |
| rs2967605  | 4.613                                       | 3.778 | 0.222           | 1.328                                       | 6.429  | 0.836   | 1.950                                     | 4.215 | 0.644           |
| rs3135506  | 5.830                                       | 6.240 | 0.350           | 20.031                                      | 11.789 | 0.090   | 6.106                                     | 5.532 | 0.270           |
| rs3764261  | 0.507                                       | 3.192 | 0.874           | 2.744                                       | 5.723  | 0.632   | -11.030                                   | 4.174 | 0.008           |
| rs3890182  | 2.795                                       | 4.706 | 0.553           | 5.048                                       | 7.974  | 0.527   | -9.546                                    | 7.013 | 0.174           |
| rs4149268  | -0.035                                      | 3.138 | 0.991           | -7.470                                      | 5.167  | 0.149   | -3.401                                    | 4.027 | 0.399           |
| rs4775041  | -4.510                                      | 3.128 | 0.150           | -2.991                                      | 7.275  | 0.681   | -2.509                                    | 4.684 | 0.592           |
| rs6102059  | -1.702                                      | 3.163 | 0.591           | 5.333                                       | 4.675  | 0.254   | -2.413                                    | 4.312 | 0.576           |
| rs693      | 11.105                                      | 3.039 | <b>2.67E-04</b> | 10.875                                      | 6.878  | 0.114   | 22.708                                    | 4.595 | <b>8.94E-07</b> |
| rs754523   | -1.758                                      | 3.123 | 0.574           | 7.625                                       | 6.429  | 0.236   | 1.332                                     | 4.306 | 0.757           |
| rs7679     | -4.225                                      | 3.833 | 0.270           | -6.495                                      | 12.818 | 0.612   | -2.828                                    | 5.615 | 0.615           |
| rs780094   | -2.484                                      | 2.923 | 0.396           | -19.277                                     | 6.766  | 0.004   | -1.304                                    | 4.068 | 0.749           |
| rs9989419  | 1.584                                       | 2.962 | 0.593           | -2.435                                      | 5.069  | 0.631   | -9.543                                    | 4.104 | 0.020           |

**Table S6. Gene-vitamin E interaction results for transformed triglyceride levels, adjusted for age and sex.**

| SNP        | Non-Hispanic Whites<br>SNP×VitE Interaction |        |                 | Non-Hispanic Blacks<br>SNP×VitE Interaction |        |                 | Mexican Americans<br>SNP×VitE Interaction |        |         |
|------------|---------------------------------------------|--------|-----------------|---------------------------------------------|--------|-----------------|-------------------------------------------|--------|---------|
|            | Beta                                        | SE     | P-value         | Beta                                        | SE     | P-value         | Beta                                      | SE     | P-value |
| rs11206510 | -0.1483                                     | 0.0459 | <b>1.27E-03</b> | 0.0877                                      | 0.0829 | 0.290           | 0.1326                                    | 0.0735 | 0.071   |
| rs12654264 | 0.0096                                      | 0.0374 | 0.797           | 0.1272                                      | 0.0585 | 0.030           | 0.1081                                    | 0.0491 | 0.028   |
| rs1501908  | 0.0550                                      | 0.0376 | 0.144           | 0.0486                                      | 0.0565 | 0.390           | -0.0160                                   | 0.0510 | 0.754   |
| rs174547   | -0.0500                                     | 0.0387 | 0.196           | 0.1363                                      | 0.0885 | 0.124           | 0.0869                                    | 0.0472 | 0.066   |
| rs1748195  | -0.0117                                     | 0.0367 | 0.751           | 0.0387                                      | 0.0577 | 0.502           | 0.0326                                    | 0.0476 | 0.494   |
| rs1883025  | -0.0067                                     | 0.0425 | 0.875           | -0.0396                                     | 0.0586 | 0.499           | -0.0577                                   | 0.0487 | 0.236   |
| rs2156552  | 0.0140                                      | 0.0483 | 0.773           | -0.0424                                     | 0.1228 | 0.730           | 0.1495                                    | 0.0935 | 0.110   |
| rs2197089  | 0.0222                                      | 0.0366 | 0.544           | -0.0015                                     | 0.0702 | 0.984           | -0.0738                                   | 0.0455 | 0.105   |
| rs2271293  | 0.0494                                      | 0.0573 | 0.388           | 0.0423                                      | 0.1154 | 0.714           | 0.0888                                    | 0.0727 | 0.222   |
| rs2338104  | -0.0421                                     | 0.0368 | 0.253           | 0.0580                                      | 0.0581 | 0.319           | 0.0514                                    | 0.0464 | 0.267   |
| rs2954029  | 0.0327                                      | 0.0357 | 0.360           | -0.0629                                     | 0.0593 | 0.289           | 0.0829                                    | 0.0477 | 0.082   |
| rs2967605  | 0.0218                                      | 0.0460 | 0.636           | -0.0293                                     | 0.0690 | 0.671           | 0.0321                                    | 0.0536 | 0.550   |
| rs3135506  | 0.0456                                      | 0.0778 | 0.558           | 0.4555                                      | 0.1238 | <b>2.45E-04</b> | 0.1918                                    | 0.0641 | 0.003   |
| rs3764261  | 0.0099                                      | 0.0394 | 0.801           | -0.0261                                     | 0.0640 | 0.684           | -0.1325                                   | 0.0509 | 0.009   |
| rs3890182  | -0.0353                                     | 0.0581 | 0.543           | -0.0487                                     | 0.0899 | 0.588           | -0.0856                                   | 0.0881 | 0.331   |
| rs4149268  | -0.0470                                     | 0.0393 | 0.232           | -0.0101                                     | 0.0535 | 0.850           | 0.0102                                    | 0.0514 | 0.842   |
| rs4775041  | -0.0223                                     | 0.0388 | 0.566           | -0.0552                                     | 0.0727 | 0.448           | -0.0911                                   | 0.0587 | 0.121   |
| rs6102059  | -0.0668                                     | 0.0394 | 0.090           | -0.0360                                     | 0.0519 | 0.488           | 0.0611                                    | 0.0532 | 0.251   |
| rs693      | 0.1449                                      | 0.0355 | <b>4.65E-05</b> | -0.0850                                     | 0.0703 | 0.227           | 0.1238                                    | 0.0492 | 0.012   |
| rs754523   | 0.0290                                      | 0.0377 | 0.442           | -0.0921                                     | 0.0687 | 0.180           | -0.0055                                   | 0.0505 | 0.913   |
| rs7679     | -0.0234                                     | 0.0466 | 0.615           | -0.0531                                     | 0.1417 | 0.708           | -0.0169                                   | 0.0691 | 0.807   |
| rs780094   | 0.0084                                      | 0.0356 | 0.814           | -0.0106                                     | 0.0753 | 0.888           | 0.0324                                    | 0.0491 | 0.510   |
| rs9989419  | 0.0202                                      | 0.0372 | 0.586           | 0.0861                                      | 0.0545 | 0.114           | 0.0183                                    | 0.0500 | 0.715   |
